# Supplementary material for: In situ fabrication of a 3D self-supported porous Ni–Mo–Cu catalyst for an efficient hydrogen evolution reaction
Source: Royal Society of Chemistry journal article supplement (doi:10.1039/d3dt00699a), 2023-01-01
Supplement: d3dt00699a1.pdf [file d3dt00699a1.pdf]

# In-situ fabrication of 3D self-supported porous Ni-Mo-Cu catalyst for efficient hydrogen evolution reaction

Fang Miao<sup>a,1</sup>, Peng Cui<sup>b\*,1</sup>, Shijie Yu<sup>b</sup>, Tao Gu<sup>a</sup>

<sup>a</sup> *College of Materials Science and Engineering, North University of China, Taiyuan, 030051, China*

<sup>b</sup> *Jiangsu Key Laboratory of Advanced Metallic Materials, School of Materials Science and Engineering, Southeast University, Nanjing, 211189, China*

<sup>1</sup>Authors contributed equally to this work

\*Corresponding author: Tel: +0086 025 52091093

Email address: cuipeng1993@hotmail.com

Mail address: School of Materials Science and Engineering, Southeast University, Nanjing, 211189, China

**Table S1**

Chemical compositions (EDS) and the samples.

| Sample | Ni, at% | Cu, at% | Mo, at% |
|--------|---------|---------|---------|
| I      | 55      | 45      | -       |
| II     | 52      | 43      | 5       |
| III    | 52      | 41      | 7       |

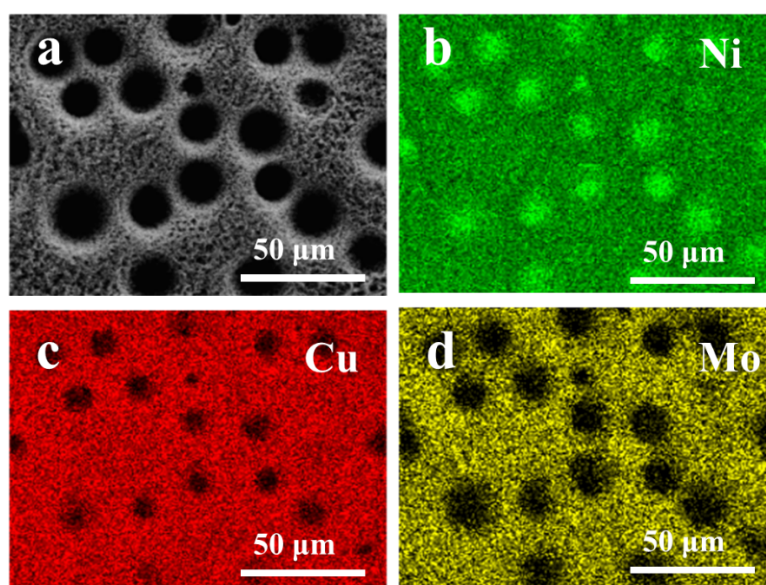**Fig. S1** (a) SEM image and (b-d) corresponding elemental mapping images of Ni, Cu, and Mo.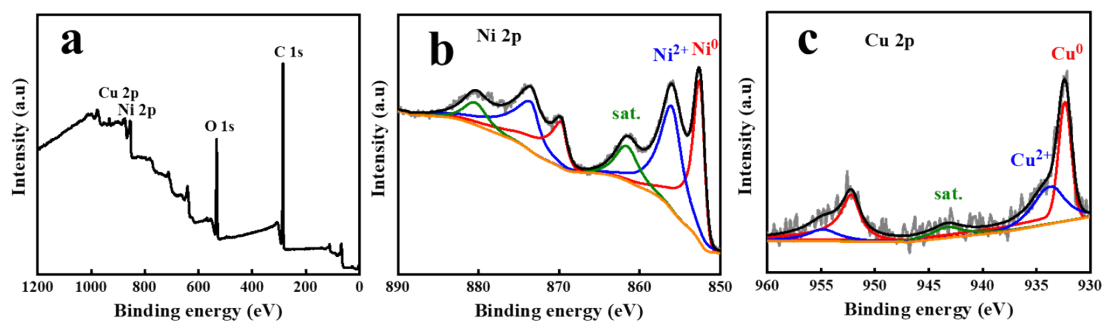**Fig. S2** XPS spectra of (a) survey, (b) Ni 2p, (c) Mo 3d, and (d) Cu 2p of sample I.

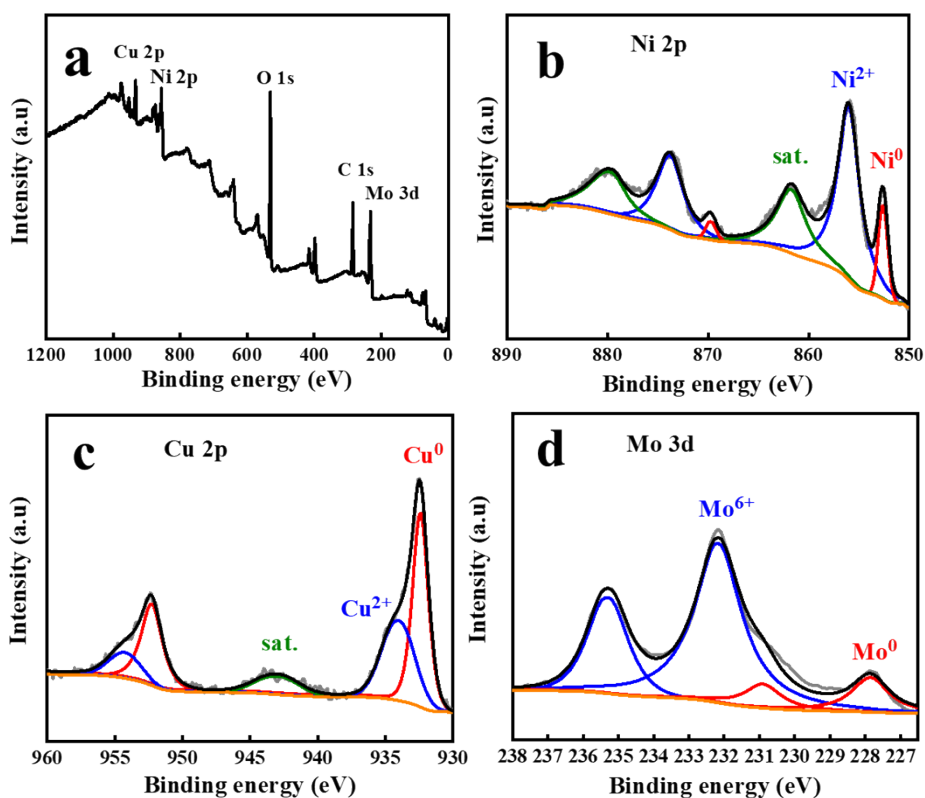

**Fig. S3** XPS spectra of (a) survey, (b) Ni 2p, (c) Mo 3d, and (d) Cu 2p of sample III.

**Table S2**

The binding energy values of Ni<sup>0</sup> 2p<sub>3/2</sub>, Cu<sup>0</sup> 2p<sub>3/2</sub>, and Mo<sup>0</sup> 3d<sub>5/2</sub> of three samples.

| Sample | Ni <sup>0</sup> 2p <sub>3/2</sub> | Cu <sup>0</sup> 2p <sub>3/2</sub> | Mo <sup>0</sup> 3d <sub>5/2</sub> |
|--------|-----------------------------------|-----------------------------------|-----------------------------------|
| I      | 852.3                             | 932.2                             | -                                 |
| II     | 852.6                             | 932.4                             | 227.6                             |
| III    | 852.5                             | 932.5                             | 227.7                             |

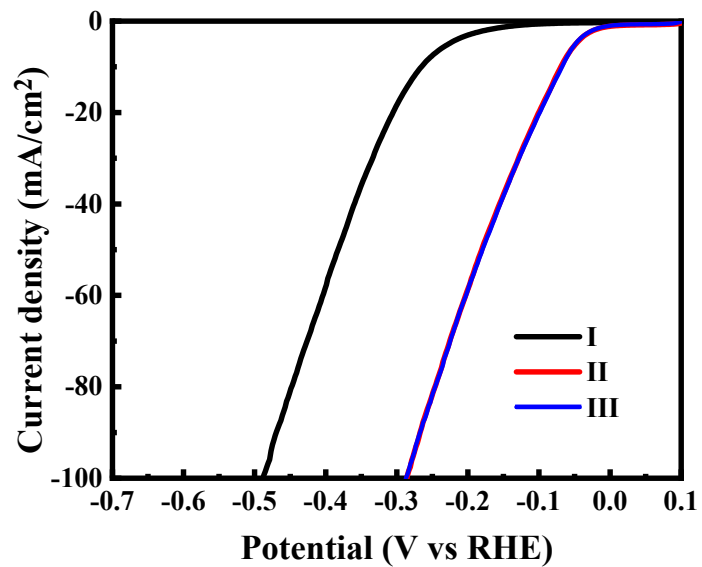

Fig.S4 LSV curves before IR compensation of the sample I, II and III.

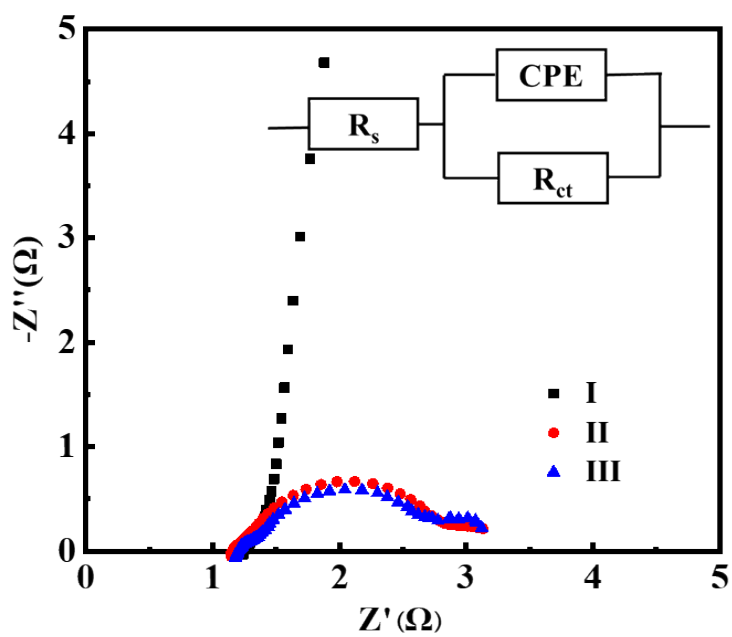

Fig. S5 EIS measurements for the samples, the inset is the equivalent circuit mode.

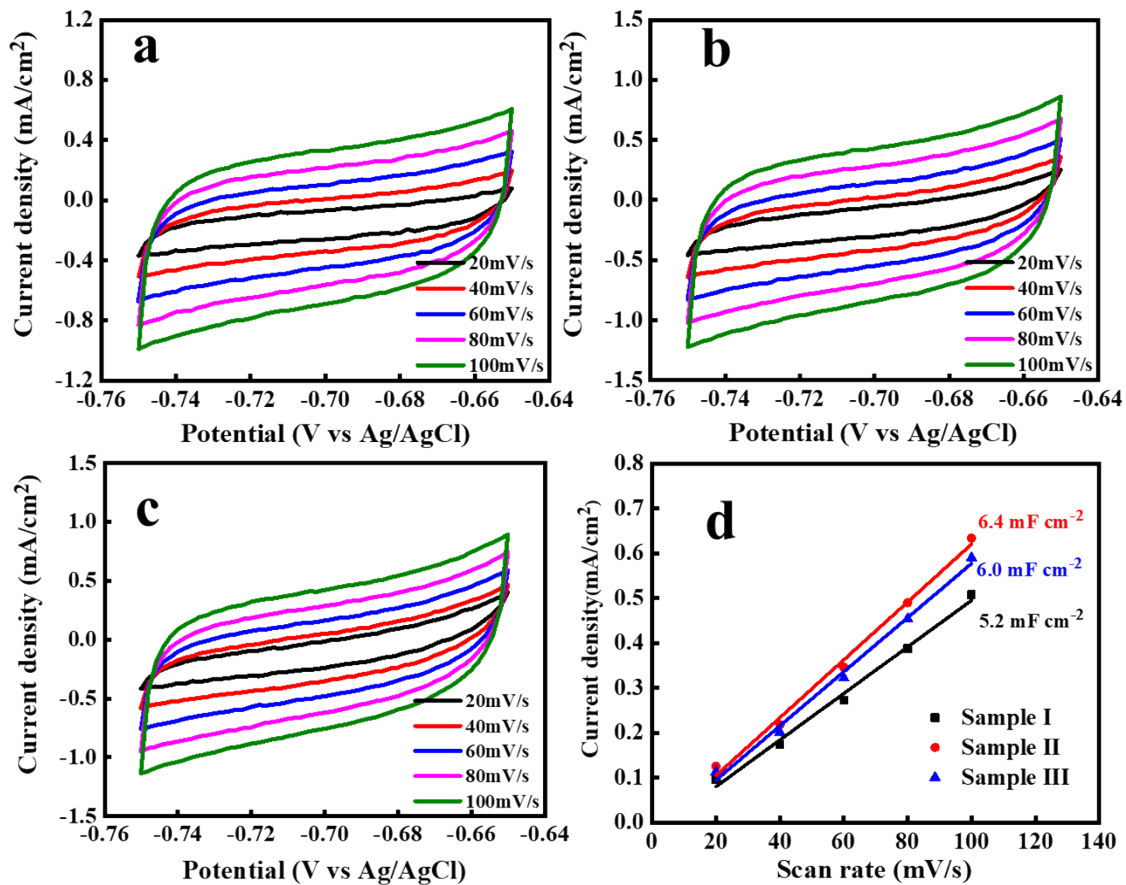

**Fig. S6** CV-scan curves of (a) sample I, (b) sample II, and (c) sample III in 1M KOH; (d)  $C_{dl}$  measurements for the samples.

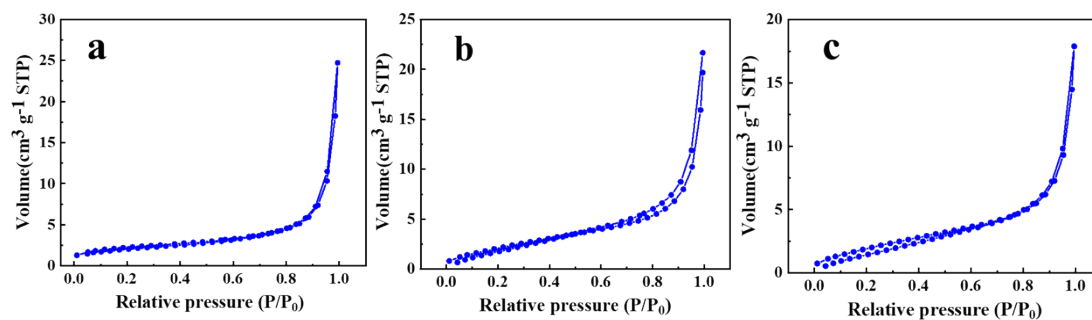

**Fig. S7** The  $N_2$  adsorption/desorption isotherm curves of (a) sample I, (b) sample II, and (c) sample III.

**Table S3**

Comparison of the HER performance of NiMoCu and other some catalysts.

| Catalysts                                | Overpotential<br>(mV) at $j = 10$<br>$\text{mA cm}^{-2}$ | Tafel slope<br>(mV/dec) | References |
|------------------------------------------|----------------------------------------------------------|-------------------------|------------|
| Ni-Mo-Cu                                 | 70                                                       | 53                      | this work  |
| 3DOM-Ni <sub>2</sub> P/Fe <sub>x</sub> P | 106                                                      | 81                      | [1]        |
| Ni(OH) <sub>2</sub> /NiMoS               | 180                                                      | 81                      | [2]        |
| NiCoP/NPC                                | 128                                                      | 70                      | [3]        |
| NiCu                                     | 76                                                       | 72                      | [4]        |
| CoP                                      | 101                                                      | 45.1                    | [5]        |
| H-B/Ru-Fe                                | 110                                                      | 76.1                    | [6]        |
| CoP/N-doped carbon                       | 167                                                      | 57                      | [7]        |
| NiCoP@SSM                                | 138                                                      | 74                      | [8]        |

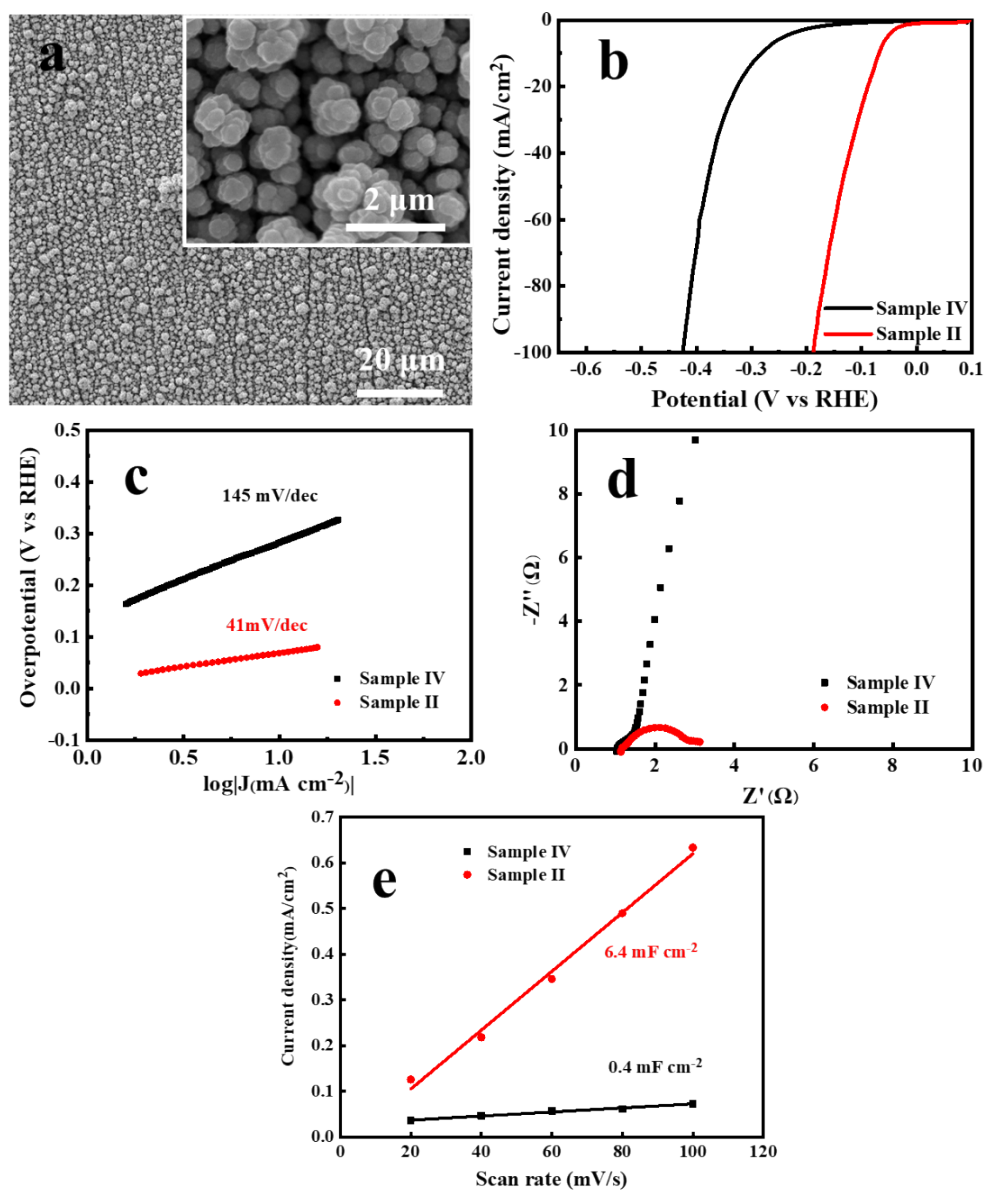

**Fig. S8** (a) SEM images of sample IV. (b) LSV curves, (c) Tafel plots, (d) EIS measures, (e)  $C_{dl}$  of sample II and sample IV.

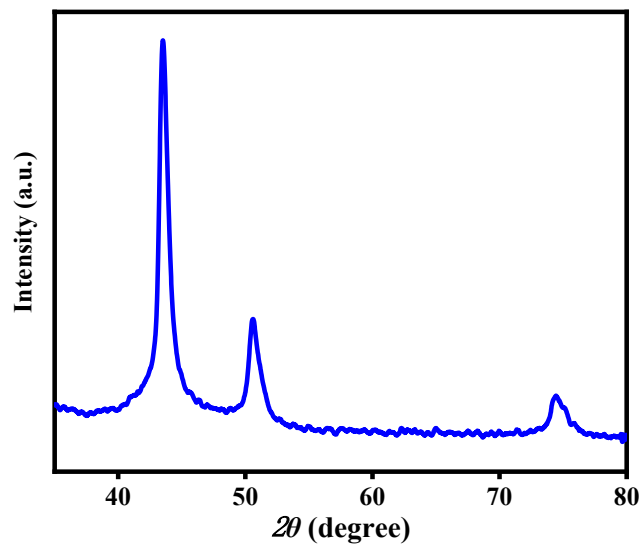

Fig. S9 XRD pattern of sample II after stability test.

Table S4

Chemical compositions (EDS) and sample II after stability test.

| Sample | Ni, at% | Cu, at% | Mo, at% |
|--------|---------|---------|---------|
| II     | 51      | 44      | 5       |

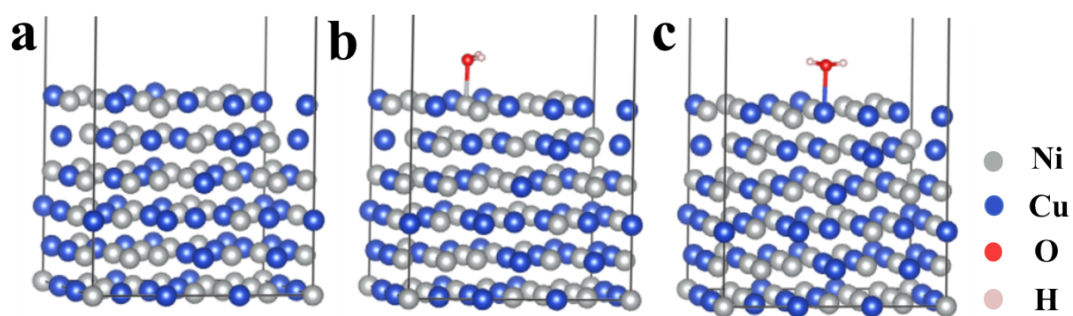

Fig. S10 (a) The optimized structure of sample I (NiCu), and the H<sub>2</sub>O molecule adsorbed on different sites of (b) Ni and (c) Cu. The values of adsorption energy of H<sub>2</sub>O molecule on Ni site and Cu site are -0.54 eV and -0.45 eV.



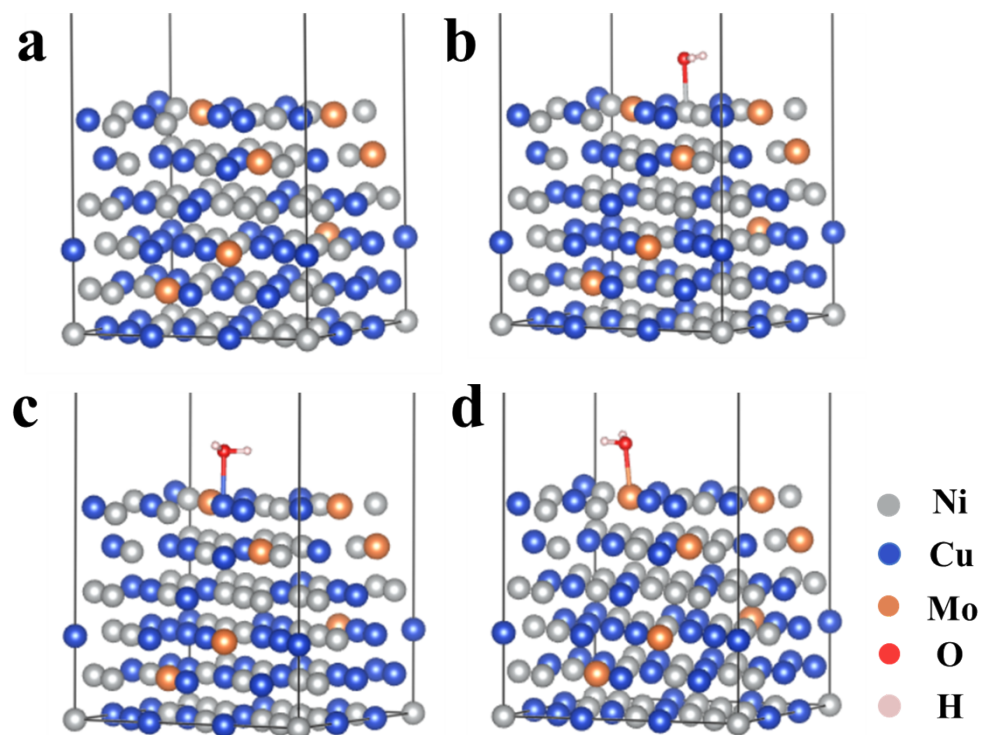

**Fig. S11** (a) The optimized structure of sample II (NiMoCu), and the H<sub>2</sub>O molecule adsorbed on different sites of (b) Ni, (c) Cu, and (d) Mo. The values of adsorption energy of H<sub>2</sub>O molecule on Ni site, Cu site, and Mo site are -0.35 eV, -0.44 eV, and -1.01 eV.

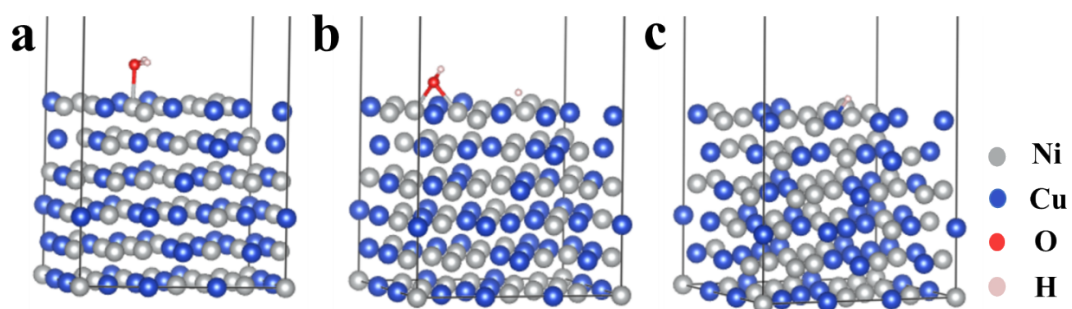

**Fig. S12** Different stages of catalytic pathways of Sample I for HER.

## References

- [1] Cao WJ, Zhao RH, Liu GH, Wu LL, Li JD. Three-dimensional ordered macroporous design of heterogeneous nickel-iron phosphide as bifunctional electrocatalyst for enhanced overall water splitting[J]. *Appl Surf Sci.* 2023; 607: 154905.
- [2] Yang CM, Zhou LH, Yan T, Bian YJ, Hu YJ, Wang CT, Zhang YT, Shi YM, Wang DJ, Zhen YZ, Feng F. Synergistic mechanism of Ni(OH)<sub>2</sub>/NiMoS heterostructure electrocatalyst with crystalline/amorphous interfaces for efficient hydrogen evolution over all pH ranges. *J Colloid Interf Sci.* 2022; 606:1004-1013.
- [3] Yi MJ, Lu BB, Zhang XT, Tan YB, Zhu ZY, Pan ZC, Zhang JH. Ionic liquid-assisted synthesis of nickel cobalt phosphide embedded in N, P codoped-carbon with hollow and folded structures for efficient hydrogen evolution reaction and supercapacitor [J]. *Appl Catal B-Environ.* 2021; 283: 119635.
- [4] Niu JJ, Yue YL, Yang CG, Wang Y, Qin JQ, Zhang XY, Wu ZS. Ultrarapid synthesis Ni-Cu bifunctional electrocatalyst by self-etching electrodeposition for high-performance water splitting reaction. *Appl Surf Sci.* 2021; 561: 150030.
- [5] Guo J, Ouyang C, Zhan Z, Lei T, Yin P. Facile synthesis of tubular CoP as a high efficient electrocatalyst for pH-universal hydrogen evolution. *Int J Hydrogen Energy.* 2022; 47:181-196.
- [6] Wang Z, Wang Y, Xiao W, et al. Ru, B Co-doped hollow structured iron phosphide as highly efficient electrocatalyst toward hydrogen generation in wide pH range[J]. *J Mater Chem A.* 2022; 10(28): 15155-15160.
- [7] Lai Y, Xia W, Li J, Pan J, Jiang C, Cai Z, Huang XL, Wang T, He JP. A confinement strategy for stabilizing two-dimensional carbon/CoP hybrids with enhanced hydrogen evolution. *Electrochim Acta.* 2021; 375: 137966.
- [8] Gebreslase GA, Martínez-Huerta MV, Sebastián D, Lázaro MJ, NiCoP/CoP sponge-like structure grown on stainless steel mesh as a high-performance electrocatalyst for hydrogen evolution reaction, *Electrochim Acta*, 2023; 438: 141538
